# Supplementary material for: Carbon-supported T-Nb2O5 nanospheres and MoS2 composites with a mosaic structure for insertion–conversion anode materials
Source: Royal Society of Chemistry journal article supplement (doi:10.1039/d3dt02224b), 2023-01-01
Supplement: d3dt02224b1.pdf [file d3dt02224b1.pdf]

## Supporting Information

### Carbon-supported T-Nb<sub>2</sub>O<sub>5</sub> nanospheres and MoS<sub>2</sub> composites with mosaic structure for insertion-conversion anode materials

Shaohao Li<sup>a</sup>, Caifeng Pan<sup>a</sup>, Zhaohui Zhao<sup>a</sup>, Wei Yang<sup>a</sup>, Hanbo Zou<sup>a,\*</sup>, Shengzhou Chen<sup>a,\*</sup>

<sup>a</sup> School of Chemistry and Chemical Engineering, Guangzhou University, Guangzhou, 510006 ,

PR China

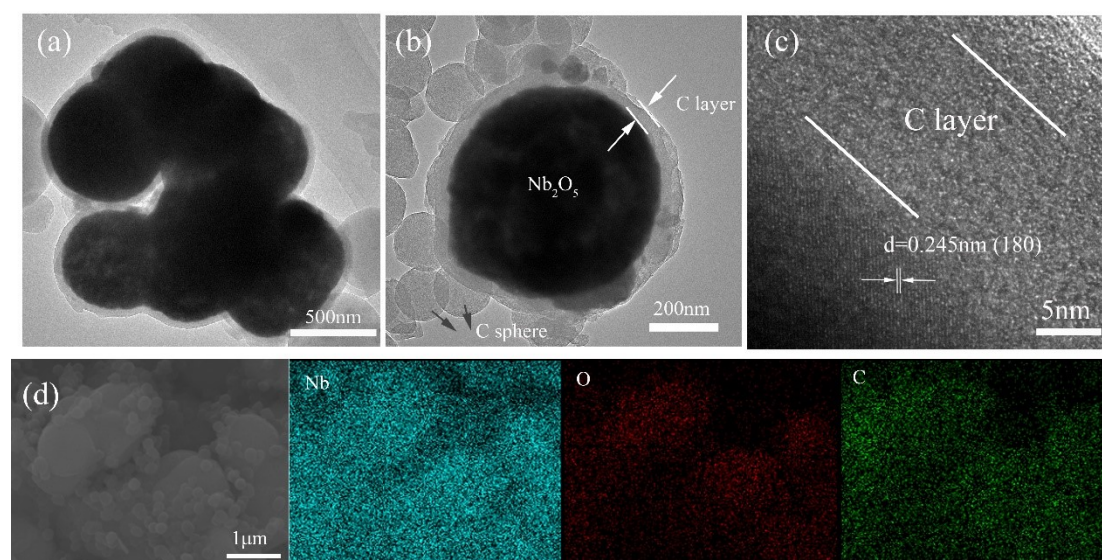

Fig. S1 (a, b) TEM images and (c) HRTEM image, (d) SEM images with Nb, O and C element sections of T-Nb<sub>2</sub>O<sub>5</sub>@C.

Table S1 Mass percentages of Nb, Mo atoms and Nb/Mo mole ratios obtained by ICP tests

| Sample                                                  | Nb       | Mo       | Nb/Mo molar ratio |
|---------------------------------------------------------|----------|----------|-------------------|
| Nb <sub>2</sub> O <sub>5</sub> @MoS <sub>2</sub> @C-2-1 | 35.2433% | 12.2744% | 2.97              |
| Nb <sub>2</sub> O <sub>5</sub> @MoS <sub>2</sub> @C-1-1 | 24.9227% | 16.4475% | 1.57              |
| Nb <sub>2</sub> O <sub>5</sub> @MoS <sub>2</sub> @C-1-2 | 11.4406% | 20.4889% | 0.58              |

Table S2 Mass percentage of each component in T-Nb<sub>2</sub>O<sub>5</sub>@MoS<sub>2</sub>@C composites obtained by

TG-DSC tests

| Sample                                                    | Component | TG-DSC tests                   |                  |        |        |        | Nb/Mo molar ratio |
|-----------------------------------------------------------|-----------|--------------------------------|------------------|--------|--------|--------|-------------------|
|                                                           |           | Nb <sub>2</sub> O <sub>5</sub> | MoS <sub>2</sub> | C      | Nb     | Mo     |                   |
| T-Nb <sub>2</sub> O <sub>5</sub> @MoS <sub>2</sub> @C-2-1 |           | 45.02%                         | 18.37%           | 36.61% | 33.85% | 11.48% | 2.94              |
| T-Nb <sub>2</sub> O <sub>5</sub> @MoS <sub>2</sub> @C-1-1 |           | 35.23%                         | 27.19%           | 37.58% | 26.49% | 16.99% | 1.56              |
| T-Nb <sub>2</sub> O <sub>5</sub> @MoS <sub>2</sub> @C-1-2 |           | 20.39%                         | 42.58%           | 37.03% | 15.33% | 26.61% | 0.57              |

Table S3 BET results of T-Nb<sub>2</sub>O<sub>5</sub>@C and T-Nb<sub>2</sub>O<sub>5</sub>@MoS<sub>2</sub>@C series samples

| Sample                                                    | BET results                                             |                                                |                                                     |
|-----------------------------------------------------------|---------------------------------------------------------|------------------------------------------------|-----------------------------------------------------|
|                                                           | Specific surface area (m <sup>2</sup> g <sup>-1</sup> ) | Pore volume (cm <sup>3</sup> g <sup>-1</sup> ) | Micropore volume (cm <sup>3</sup> g <sup>-1</sup> ) |
| T-Nb <sub>2</sub> O <sub>5</sub> @MoS <sub>2</sub> @C-2-1 | 436.2                                                   | 0.394                                          | 0.058                                               |
| T-Nb <sub>2</sub> O <sub>5</sub> @MoS <sub>2</sub> @C-1-1 | 420.7                                                   | 0.405                                          | 0.112                                               |
| T-Nb <sub>2</sub> O <sub>5</sub> @MoS <sub>2</sub> @C-1-2 | 367.2                                                   | 0.246                                          | 0.087                                               |
| T-Nb <sub>2</sub> O <sub>5</sub> @C                       | 128                                                     | 0.12                                           | 0.013                                               |

Table S4 The rate performance of T-Nb<sub>2</sub>O<sub>5</sub>@C and T-Nb<sub>2</sub>O<sub>5</sub>@MoS<sub>2</sub>@C series samples (mAh g<sup>-1</sup>).

| Sample                                                    | Current densities (A g <sup>-1</sup> ) |      |     |     |     | turn back to 0.1 |
|-----------------------------------------------------------|----------------------------------------|------|-----|-----|-----|------------------|
|                                                           | 0.1                                    | 0.25 | 0.5 | 1   | 2   |                  |
| T-Nb <sub>2</sub> O <sub>5</sub> @MoS <sub>2</sub> @C-2-1 | 460                                    | 375  | 293 | 216 | 129 | 413              |
| T-Nb <sub>2</sub> O <sub>5</sub> @MoS <sub>2</sub> @C-1-1 | 518                                    | 404  | 349 | 277 | 194 | 477              |
| T-Nb <sub>2</sub> O <sub>5</sub> @MoS <sub>2</sub> @C-1-2 | 497                                    | 402  | 315 | 227 | 140 | 427              |
| T-Nb <sub>2</sub> O <sub>5</sub> @C                       | 350                                    | 263  | 211 | 157 | 109 | 318              |

Table S5 The comparison of capacity performance in between present material  
(T-Nb<sub>2</sub>O<sub>5</sub>@MoS<sub>2</sub>@C) with other related electrode materials.

| Materials                                             | After cycles | Current density (A g <sup>-1</sup> ) | Specific capacity (mAh g <sup>-1</sup> ) | Capacity retained(%) | Ref       |
|-------------------------------------------------------|--------------|--------------------------------------|------------------------------------------|----------------------|-----------|
| T-Nb <sub>2</sub> O <sub>5</sub> @NbS <sub>2</sub> @C | 500          | 2                                    | 102                                      | 51                   | [4]       |
| Nb <sub>2</sub> O <sub>5</sub>                        | 100          | 0.2                                  | 175                                      | 74.4                 | [8]       |
| MoO <sub>3</sub> -rGO                                 | 100          | 0.5                                  | 568                                      | 71                   | [13]      |
| Nb <sub>2</sub> O <sub>5</sub> /carbon                | 600          | 1                                    | 240                                      | 96                   | [14]      |
| ASC/Nb <sub>2</sub> O <sub>5</sub>                    | 1200         | 1                                    | 62                                       | 50.8                 | [15]      |
| Nb <sub>2</sub> O <sub>5</sub> @MoS <sub>2</sub> CNFs | 1000         | 1                                    | 140                                      | 69.6                 | [17]      |
| MoS <sub>2</sub> /C                                   | 200          | 1                                    | 415                                      | 107.8                | [18]      |
| MoS <sub>2</sub>                                      | 100          | 0.1                                  | 446                                      | 54.1                 | [19]      |
| Nb <sub>2</sub> O <sub>5</sub> /SMCNTs                | 100          | 0.04                                 | 441                                      | 98                   | [23]      |
| Nb <sub>2</sub> O <sub>5</sub> -C-rGO                 | 5000         | 20                                   | 107                                      | 70                   | [27]      |
| Nb <sub>2</sub> CT <sub>x</sub> /MoS <sub>2</sub> @CS | 800          | 1                                    | 184                                      | 49.2                 | [29]      |
| T-Nb <sub>2</sub> O <sub>5</sub> @C                   | 2000         | 2                                    | 169.6                                    | 88.9                 | [31]      |
| Nb <sub>2</sub> O <sub>5</sub> @rGO                   | 1000         | 2                                    | 122                                      | 81.9                 | [32]      |
| Nb <sub>2</sub> O <sub>5</sub> HNS@S rGO              | 1000         | 1                                    | 140                                      | 66.6                 | [34]      |
| Nb <sub>2</sub> O <sub>5</sub> /C                     | 100          | 0.5                                  | 150                                      | 75                   | [40]      |
| Nb <sub>2</sub> O <sub>5</sub> @Carbon                | 7000         | 2                                    | 130                                      | 81                   | [47]      |
| T-Nb <sub>2</sub> O <sub>5</sub> @MoS <sub>2</sub> @C | 1000         | 2                                    | 187                                      | 84.8                 | This work |

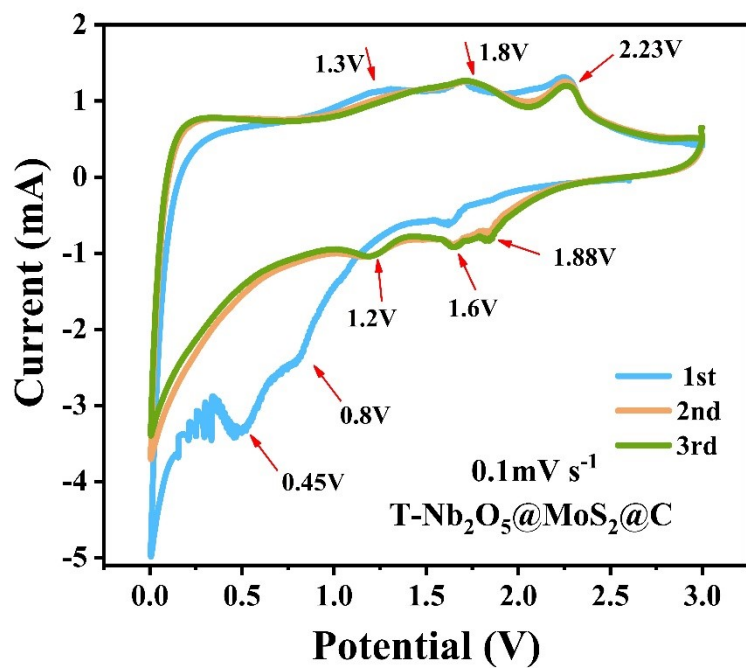

Fig. S6 The CV curves of T-Nb<sub>2</sub>O<sub>5</sub>@MoS<sub>2</sub>@C electrode at a scan rate of 0.1 mV s<sup>-1</sup>

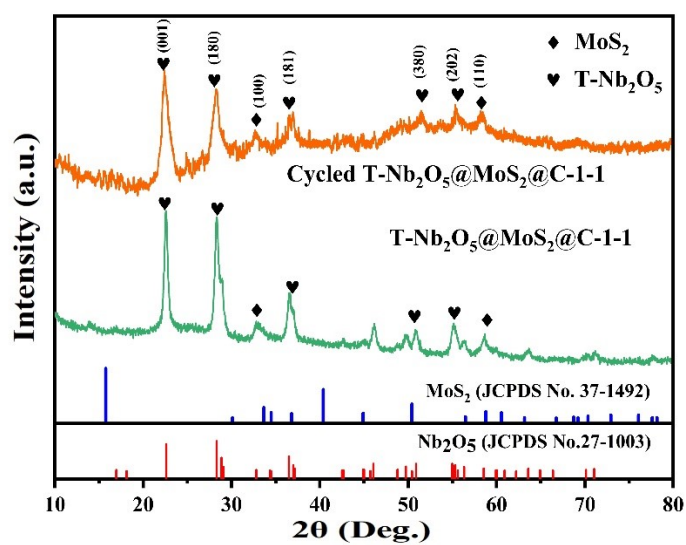

Fig. S7 XRD of T-Nb<sub>2</sub>O<sub>5</sub>@MoS<sub>2</sub>@C-1-1 cycled electrode and T-Nb<sub>2</sub>O<sub>5</sub>@MoS<sub>2</sub>@C-1-1 electrode
